# Supplementary material for: A Nomogram model for predicting the occurrence of no-reflow phenomenon after percutaneous coronary intervention using the lncRNA TUG1/miR-30e/NPPB biomarkers
Source: PubMed Central journal article supplement — J Thorac Dis. 2022 Jun;14(6):2158–68. doi: 10.21037/jtd-22-481 (PMC9264104; doi:10.21037/jtd-22-481), 2022-06
Supplement: jtd-14-06-2158-dss.pdf [file jtd-14-06-2158-dss.pdf]

## Data Sharing Statement

|                     |                                                                                                                                                     |                                                                                                                                      |
|---------------------|-----------------------------------------------------------------------------------------------------------------------------------------------------|--------------------------------------------------------------------------------------------------------------------------------------|
| <b>Article Info</b> | <a href="https://dx.doi.org/10.21037/jtd-22-481">https://dx.doi.org/10.21037/jtd-22-481</a>                                                         |                                                                                                                                      |
| <b>Item</b>         | <b>Question</b>                                                                                                                                     | <b>Authors' Response<br/>(place "-" if not applicable)</b>                                                                           |
| 1                   | Would you like to share data collected for your study to others?                                                                                    | No.                                                                                                                                  |
| 2                   | If not, would you like to share the reason for your decision?                                                                                       | -                                                                                                                                    |
| 3                   | What data in particular will be shared?                                                                                                             | -                                                                                                                                    |
| 4                   | Any other documents will be shared? Such as study protocol, statistical analysis plan, informed consent form, clinical study report, analytic code. | Statistical analysis plan, informed consent form, and clinical study report will also be shared if requested.                        |
| 5                   | When will data availability begin?                                                                                                                  | From the publication date, in addition, upon request to corresponding author the data will be shared.                                |
| 6                   | When will data availability end?                                                                                                                    | Not applicable, as the data supporting the findings of this study are available within the paper.                                    |
| 7                   | To whom will you share the data?                                                                                                                    | Cardiovascular physician who are interested in studies of STEMI.                                                                     |
| 8                   | For what type of analysis or purpose?                                                                                                               | Provide information for individualized treatment in patients with STEMI.                                                             |
| 9                   | How or where can the data/documents be obtained?                                                                                                    | Emails could be sent to the address below to obtain the shared documents: <a href="mailto:drsuoqiang@163.com">drsuoqiang@163.com</a> |
| 10                  | Any other restrictions?                                                                                                                             | We may balance the potential benefits and risks for each request and then provide the documents that could be shared.                |
